# Supplementary material
Source: PubMed Central journal article supplement (PMC8511954)
Supplement: mmc1.pdf [file mmc1.pdf]

## **Supporting Information**

**Structures of synthetic nanobody–SARS-CoV-2–RBD complexes reveal distinct sites of interaction and recognition of variants**

**Authors:** Javeed Ahmad<sup>1†</sup>, Jiansheng Jiang<sup>1†</sup>, Lisa F. Boyd<sup>1</sup>, Allison Zeher<sup>2</sup>, Rick Huang<sup>2</sup>, Di Xia<sup>2</sup>, Kannan Natarajan<sup>1</sup>, and David H. Margulies<sup>1\*</sup>

**Table S1. Sybody contacts to RBD**

**Table S2. Interface Buried Surface Area of Sybody/Nanbody/Fab with RBD/Spike**

**Figure S1. SEC profiles reveal direct interaction of sybodies with RBD**

**Figure S2. Electron density maps of sybody CDR match models**

**Figure S3. Comparison of liganded vs unliganded Sb16**

**Figure S4. CryoEM data processing and classification of SB45+S-6P**

**Figure S5. Cryo-EM electron density map of Sb45 on S-6P**

**Figure S6. Superposition of X-ray models on spike maps**

**Figure S7. Antibody classifications based on site of RBD interaction**

**Figure S8. Purity of sybodies, RBD, and S**

**Figure S9. Sybodies, RBD, and spike protein reveal unique thermal stability**

**Table S1. Sybody contacts to RBD**

| RBD residue | Sb14 contact | Dist (Å) | Sb14 contact | Dist (Å) | Region |
|-------------|--------------|----------|--------------|----------|--------|
| R403        | E35          | 2.97     | W47          | 3.30     | beta3  |
| D405        | K52          | 2.62     | T56          | 3.15     | CDR2   |
| G416        | Y99          | 3.76     |              |          | CDR3   |
| K417        | E35          | 2.89     | Y37          | 3.69     | beta3  |
| D420        | Y99          | 2.61     |              |          | CDR3   |
| Y421        | S103         | 3.38     | S102         | 3.58     | CDR3   |
| G446        | Y62          | 3.51     |              |          | loop5  |
| Y453        | Y37          | 2.68     |              |          | beta3  |
| L455        | S103         | 2.62     | Y97          | 3.49     | CDR3   |
| F456        | R45          | 3.79     |              |          | beta4  |
| E484        | Q39          | 2.89     |              |          | beta3  |
| N487        | Q107         | 3.61     |              |          | beta9  |
| Y489        | I105         | 3.52     |              |          | beta9  |
| F490        | R45          | 2.81     |              |          | beta4  |
| L492        | R45          | 3.26     |              |          | beta4  |
| Q493        | R45          | 2.89     | W47          | 3.52     | beta4  |
| S494        | E44          | 3.47     |              |          | beta4  |
| Q498        | Y60          | 2.82     | Y62          | 3.48     | beta5  |
| T500        | K65          | 3.07     |              |          | loop5  |
| N501        | Y60          | 2.84     | A59          | 3.52     | beta5  |
| G502        | T56          | 3.74     |              |          | CDR2   |
| V503        | T56          | 3.67     |              |          | CDR2   |
| G504        | T56          | 2.91     |              |          | CDR2   |
| Y505        | E33          | 2.62     | K52          | 3.26     | CDR1   |

| RBD residue | Sb16 contact | Dist (Å) | Sb16 contact | Dist (Å) | Region  |
|-------------|--------------|----------|--------------|----------|---------|
| R403        | Y54          | 3.88     |              |          | CDR2    |
| E406        | Y54          | 2.65     |              |          | CDR2    |
| K417        | Y54          | 3.42     |              |          | CDR2    |
| V445        | R45          | 3.72     |              |          | beta4   |
| G446        | Y37          | 3.23     |              |          | CDR1    |
| G447        | Y37          | 3.39     |              |          | CDR1    |
| Y449        | I98          | 3.51     | W35          | 3.40     | CDR3    |
| L452        | W100         | 3.45     |              |          | CDR3    |
| Y453        | S53          | 2.64     | Y54          | 3.71     | CDR2    |
| L455        | Y31          | 3.48     | Y54          | 3.39     | CDR1    |
| F456        | Y31          | 3.32     |              |          | CDR1    |
| E484        | K32          | 2.56     | P28          | 3.47     | CDR1    |
| G485        | P28          | 3.43     |              |          | CDR1    |
| Y489        | A30          | 3.55     | Y31          | 3.45     | CDR1    |
| F490        | W100         | 3.75     |              |          | CDR3    |
| L492        | W100         | 3.45     |              |          | CDR3    |
| Q493        | W100         | 3.05     | T33          | 3.17     | CDR3    |
| S494        | T33          | 3.78     | W100         | 3.62     | CDR1    |
| Y495        | W35          | 3.23     |              |          | CDR2    |
| G496        | W35          | 3.60     |              |          | CDR1    |
| Q498        | W47          | 3.19     | Y37          | 3.28     | Beta3&4 |
| N501        | R60          | 3.49     |              |          | CDR2    |
| G502        | R60          | 2.94     |              |          | CDR2    |
| Y505        | E52          | 3.61     | R60          | 3.55     | CDR2    |

| RBD residue | Sb45 contact | Dist (Å) | Sb45 contact | Dist (Å) | Region |
|-------------|--------------|----------|--------------|----------|--------|
| Y351        | A54          | 3.53     |              |          | CDR2   |
| R403        | H103         | 2.76     | G102         | 3.06     | CDR3   |
| D405        | Y105         | 2.92     |              |          | CDR3   |
| G446        | F27          | 3.58     | G26          | 3.51     | CDR1   |
| G447        | P28          | 3.28     |              |          | CDR1   |
| Y449        | D100         | 3.07     | R31          | 3.62     | CDR3/1 |
| N450        | Y30          | 3.27     |              |          | CDR1   |
| L452        | S53          | 3.80     | D32          | 3.76     | CDR2   |
| Y453        | Y107         | 3.03     | V101         | 3.64     | CDR3   |
| L455        | Y107         | 3.05     |              |          | CDR3   |
| T470        | R59          | 2.84     | G55          | 3.18     | CDR2   |
| I472        | R59          | 3.67     |              |          | CDR1   |
| G482        | R59          | 3.23     |              |          | CDR1   |
| V483        | Y60          | 3.62     | K65          | 3.37     | CDR2   |
| E484        | R33          | 2.96     | Y52          | 2.44     | CDR1   |
| F490        | Y52          | 3.48     |              |          | CDR2   |
| L492        | A54          | 3.74     |              |          | CDR2   |
| Q493        | K99          | 2.96     | D32          | 3.39     | CDR3   |
| S494        | D32          | 2.63     |              |          | CDR1   |
| Q498        | G26          | 3.14     |              |          | CDR1   |
| N501        | H103         | 3.50     |              |          | CDR3   |
| G502        | H103         | 3.32     |              |          | CDR3   |
| Y505        | V101         | 3.25     | H103         | 3.75     | CDR3   |

| RBD residue | Sb68 contact | Dist (Å) | Sb68 contact | Dist (Å)  | Region |
|-------------|--------------|----------|--------------|-----------|--------|
| Y369        | Y103         | 2.82     | T32          | 3.43      | CDR3/1 |
| N370        | N55          | 2.93     | V54          | 3.56      | CDR2   |
| S371        | H57          | 3.77     |              |           | CDR2   |
| F374        | Y59          | 2.98     | Y103         | 3.54      | CDR2/3 |
| S375        | W105         | 2.80     | A104         | 3.34      | CDR3   |
| T376        | Y103         | 3.47     | A104         | 3.74      | CDR3   |
| F377        | Y103         | 2.86     | G102         | 3.31      | CDR3   |
| K378        | D111         | 2.84     | W101         | 3.33      | CDR3   |
| C379        | W101         | 2.87     |              |           | CDR3   |
| P384        | G102         | 3.62     | A100         | 3.72      | CDR3   |
| R408        | D111         | 3.06     | D110/H108    | 3.39/3.42 | CDR3   |

**Table S2. Interface Buried Surface Area of Sybody/Nanbody/Fab with RBD/Spike**

(Values of buried surface area (BSA) are shown. N indicates number of residues in contact,  $N_{HB}$  is number of hydrogen bonds,  $N_{SB}$  is number of salt bridge. Data were calculated from indicated PDB by PISA: <https://www.ebi.ac.uk/pdbe/pisa/>)

| Complex(A+B)                   | BSA ( $\text{\AA}^2$ ) | $N_{res}^A$ | $N_{res}^B$ | $N_{HB}$ | $N_{SB}$ | PDB     | Resol |
|--------------------------------|------------------------|-------------|-------------|----------|----------|---------|-------|
| ACE2+RBD                       | 844                    | 26          | 26          | 13       | 2        | 6M0J    | 2.45  |
| *(SB14)+RBD                    | 1040                   | 31          | 34          | 24       | 5        | 7MFU_B  | 1.70  |
| *(Sb14+Sb68)+RBD               | 1663                   | 47          | 52          | 23       | 8        | 7MFU    | 1.70  |
| Sb16+RBD                       | 1003                   | 26          | 29          | 8        | 1        | 7KGK    | 2.60  |
| Sb45+RBD                       | 976                    | 27          | 33          | 15       | 4        | 7KGJ    | 2.10  |
| *(Sb45)+RBD                    | 1010                   | 26          | 35          | 14       | 4        | 7KLW_B  | 2.60  |
| *(Sb68)+RBD                    | 640                    | 21          | 17          | 9        | 4        | 7KLW_C  | 2.60  |
| *(Sb45+Sb68)+RBD               | 1650                   | 47          | 52          | 23       | 8        | 7KLW    | 2.60  |
| *(VHH-E)+RBD                   | 821                    | 29          | 27          | 13       | 1        | 7KN5_C  | 1.87  |
| *(VHH-U)+RBD                   | 625                    | 16          | 20          | 17       | 0        | 7KN5_E  | 1.87  |
| *(VHH-E+VHH-U)+RBD             | 1446                   | 45          | 47          | 30       | 1        | 7KN5    | 1.87  |
| H11D4+RBD                      | 599                    | 20          | 20          | 11       | 4        | 6YZ5    | 1.80  |
| H11H4+RBD                      | 637                    | 17          | 19          | 5        | 4        | 6ZBP    | 1.85  |
| (CR3022)+RBD                   | 991                    | 19          | 20          | 7        | 4        | 6XC7_HL | 2.88  |
| VHH72+RBD                      | 796                    | 21          | 25          | 9        | 2        | 6WAQ_A  | 2.20  |
| Nb20+RBD                       | 705                    | 22          | 21          | 9        | 4        | 7JVB    | 3.29  |
| Nb6+Spike                      | 788                    | 24          | 21          | 9        | 1        | 7KKK_D  | 3.03  |
| Sb23+Spike                     | 772                    | 21          | 22          | 5        | 0        | 7A25_D  | 3.06  |
| Sb23+Spike                     | 585                    | 18          | 21          | 5        | 0        | 7A29_D  | 2.94  |
| Ty1+Spike                      | 795                    | 23          | 26          | 3        | 0        | 6ZXN_D  | 2.93  |
| C144+Spike                     | 689                    | 22          | 24          | 7        | 0        | 7K90_H  | 3.24  |
| C002+Spike                     | 728                    | 22          | 23          | 7        | 1        | 7K8S_H  | 3.40  |
| *(REGN10933)+RBD               | 935                    | 28          | 30          | 9        | 1        | 6XDG_BD | 3.90  |
| *(REGN10987)+RBD               | 607                    | 21          | 19          | 5        | 0        | 6XDG_AC | 3.90  |
| *(REGN10933+<br>REGN10987)+RBD | 1542                   | 49          | 49          | 5        | 0        | 6XDG    | 3.90  |

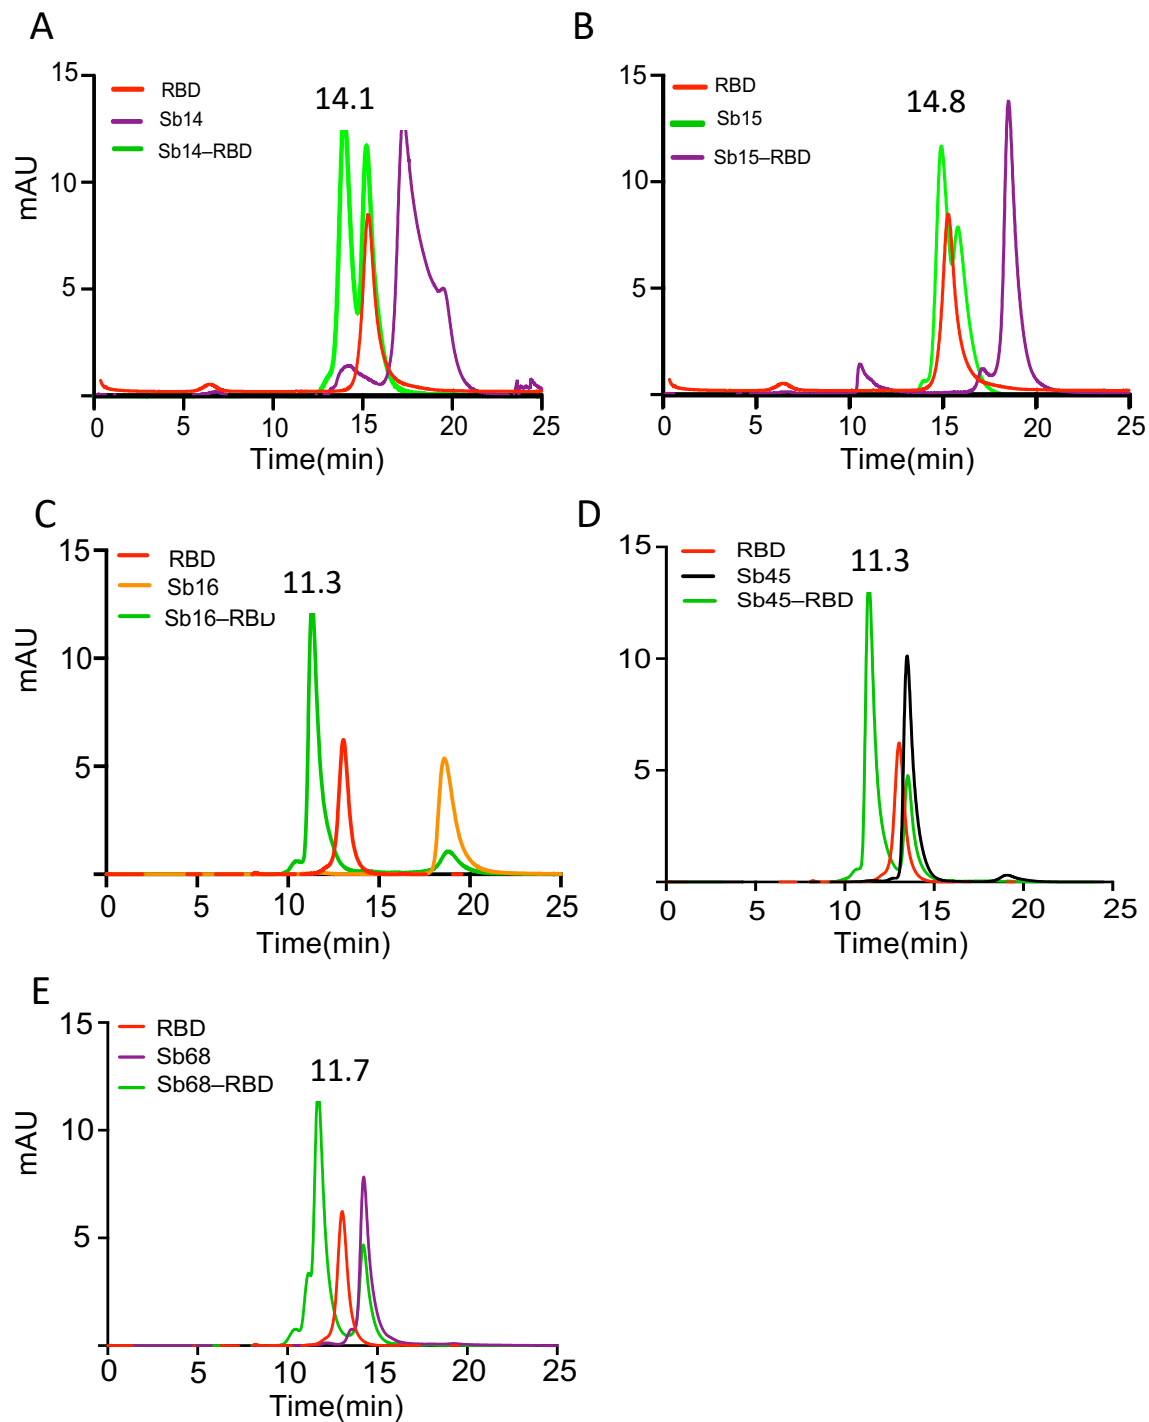

**Figure S1. SEC profiles reveal direct interaction of sybodies with RBD.** *A, B*, Sybodies and RBD were analyzed on either Shodex-KW-803, or *C, D, E*, Shodex-KW-802 column. *A*, Sb14 and RBD, *B*, Sb15 and RBD, *C*, Sb16 and RBD, *D*, Sb45 and RBD, or *E*, Sb68 and RBD were mixed in equal concentrations (50  $\mu\text{g}$  in 100  $\mu\text{l}$ ), incubated at 4  $^{\circ}\text{C}$  overnight, and then analyzed.

Figure S1.

**A** Sb16

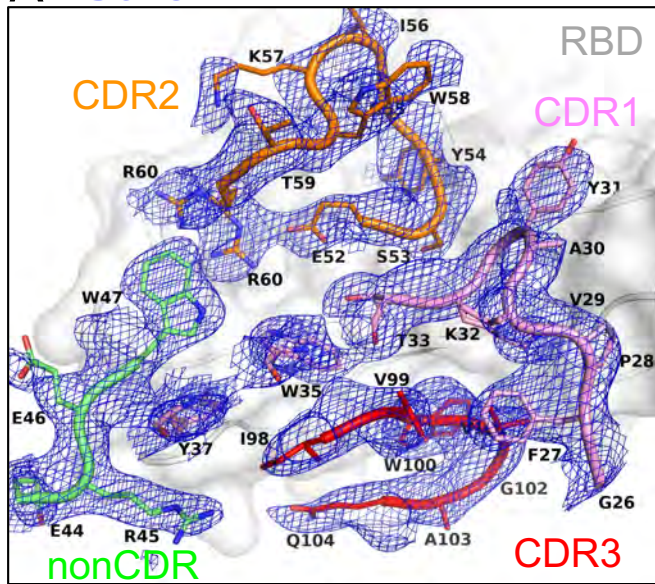

**B** Sb45

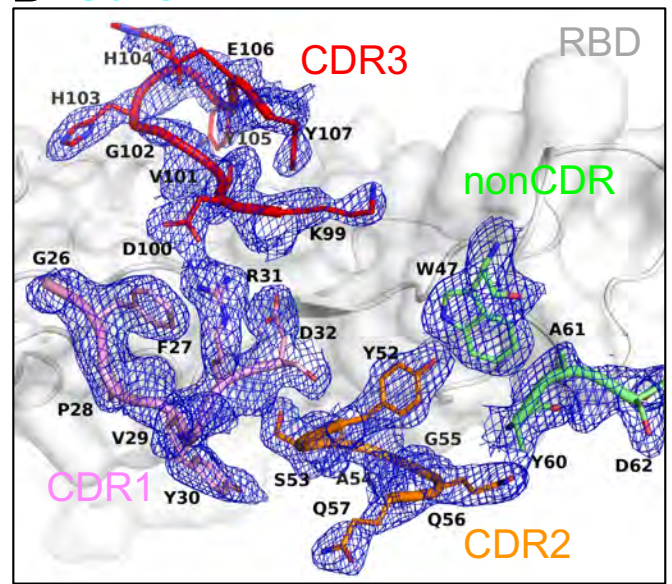

**C** Sb68

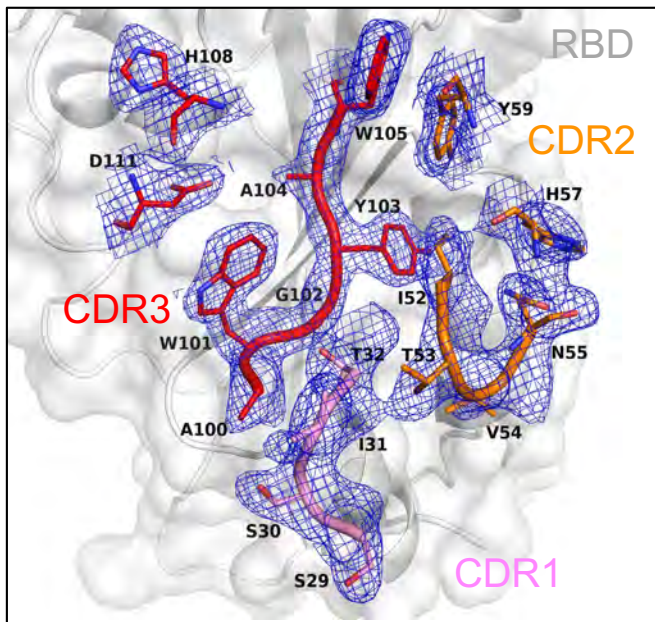

**D** Sb14

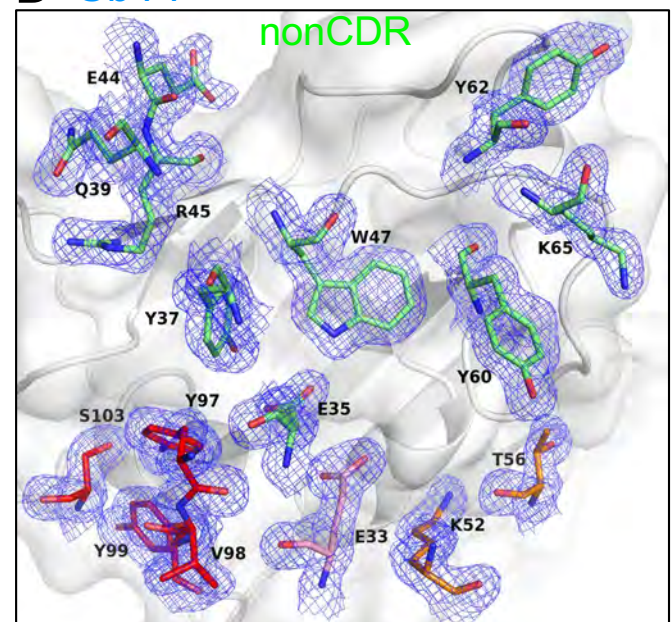

**E** Sb16 alone

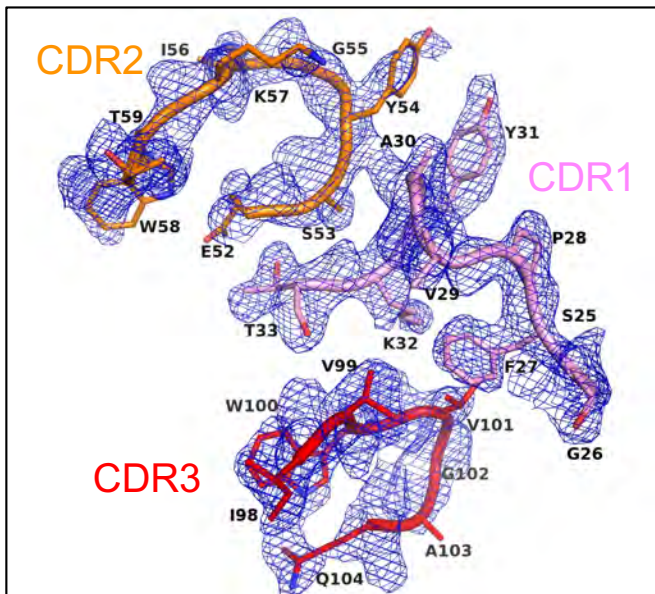

Figure S2.

**Figure S2. Electron density maps of sybody CDR match models.** Electron density maps (2mFo-DFc) (blue) for CDR loops and those residues in contact with RBD are superposed on models. *A*, Sb16 on RBD surface, Resolution=2.6 Å, Rfree=0.277. *B*, Sb45 on RBD surface, Resolution=2.3 Å, Rfree=0.216. *C*, Sb68 on RBD surface, Resolution=2.6 Å, Rfree=0.255. *D*, Sb14 on RBD surface, Resolution=1.7 Å, Rfree=0.215. *E*, Sb16 alone, Resolution=2.1 Å, Rfree=0.259. Maps are contoured at 1.0  $\sigma$ , CDR1 loop as pink, CDR2 loop as orange, CDR3 loop as red, non-CDR residues as lime, and RBD is in background as gray.

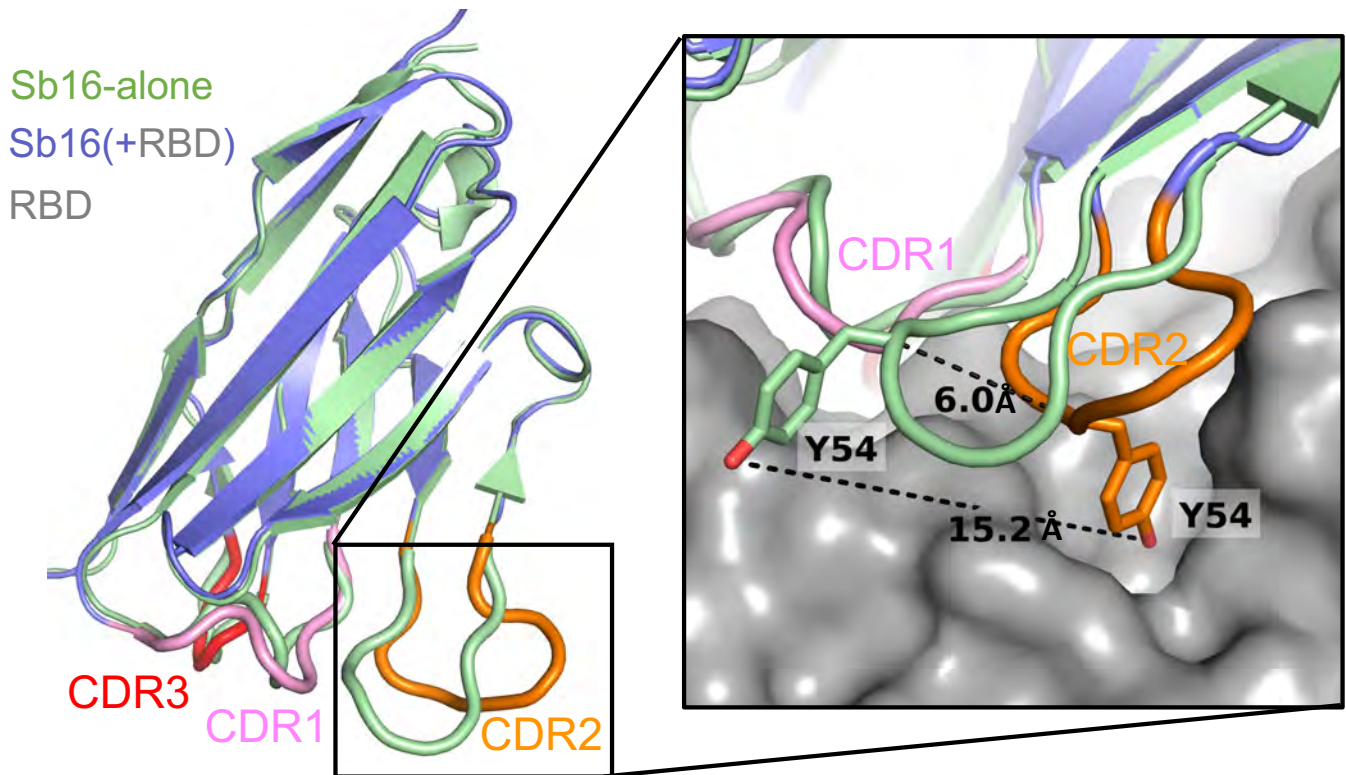

Figure S3.

**Figure S3. Comparison of liganded vs unliganded Sb16.** A superimposition Sb16-alone (“unliganded”, free, green) and Sb16+RBD (“liganded”, complexed, slate) reveals the large movement of CDR2 loop (about 6 Å). Specifically, Y54 moved about 15 angstroms and dipped into a binding pocket which is surrounded by epitopic residues Q409, E406, D405, R403, G416, K417, I418, N422, L455, Y453, Y495. (RBD surface is gray).

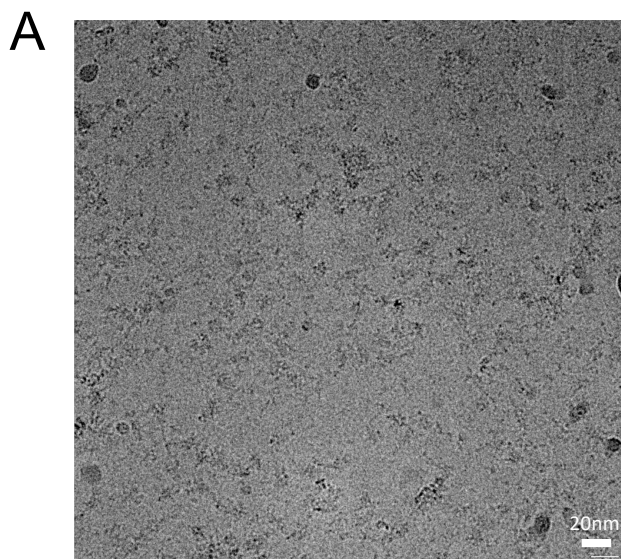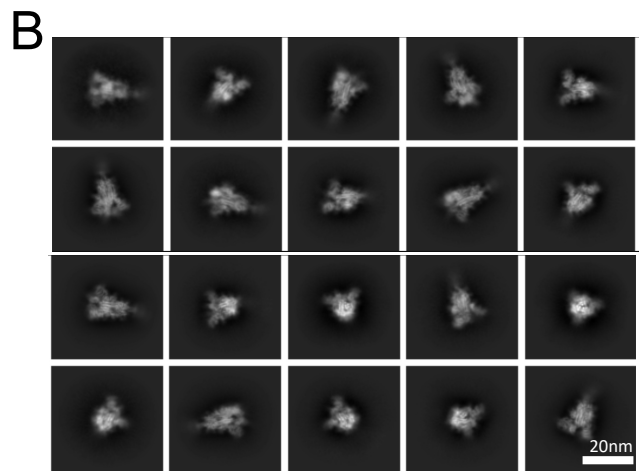

662,994 particles from 2D classes

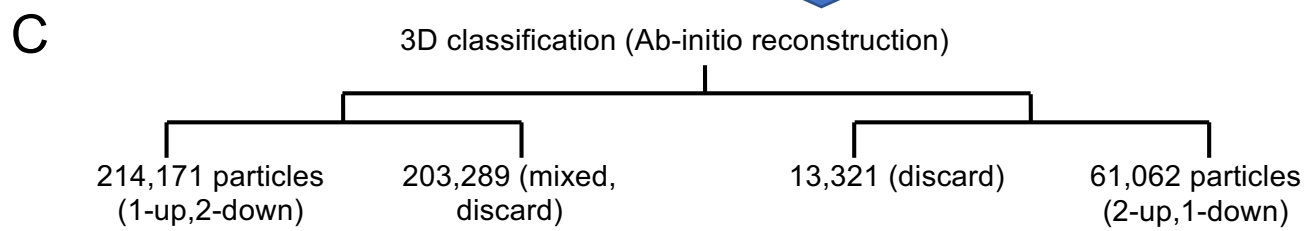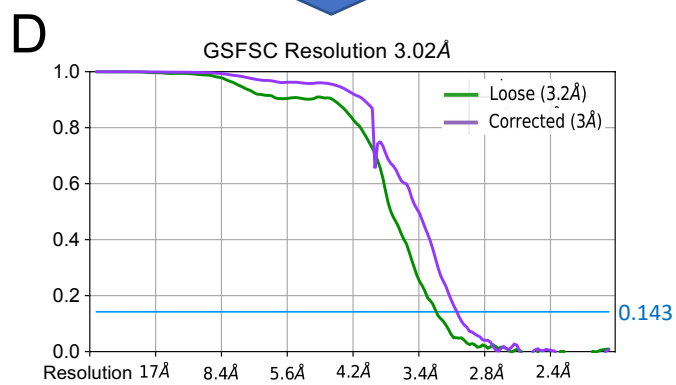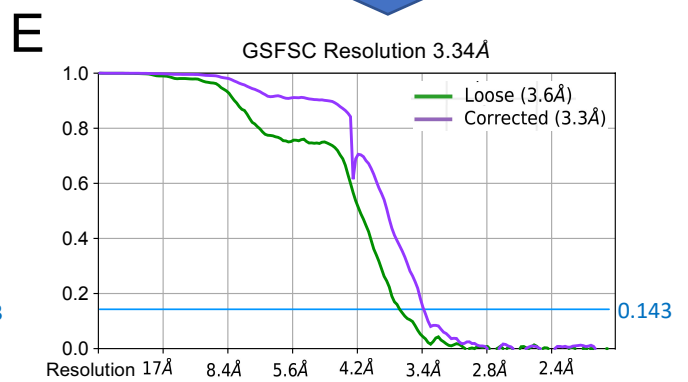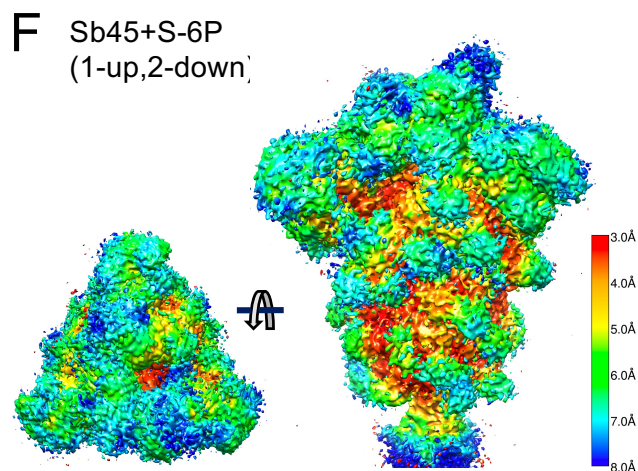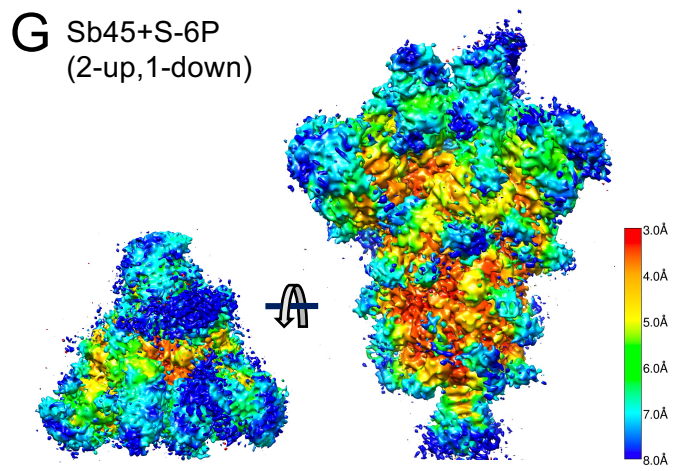

Figure S4.



**Figure S4. CryoEM data processing and classification of SB45+S-6P.** *A*, Negative stain image of Sb45 + S-6P. *B*, 2D classes of averages. *C*, 3D classification (Ab-initio reconstruction) to recognize two forms of S-6P. *D*, After homogeneity refinement and final non-uniform refinement, Gold-standard Fourier shell correlation (FSC) presents the resolution (at 0.143) for the map of 1-up, 2-down form of S-6P. *E*, For the map of 2-up, 1-down form of S-6P. *F*, Local resolution estimation for 1-up, 2-down form of S-6P. *G*, Local resolution estimation for 2-up, 1-down form of S-6P, color as the resolution scale bar.

Sb45+S-6P (1-up, 2-down)

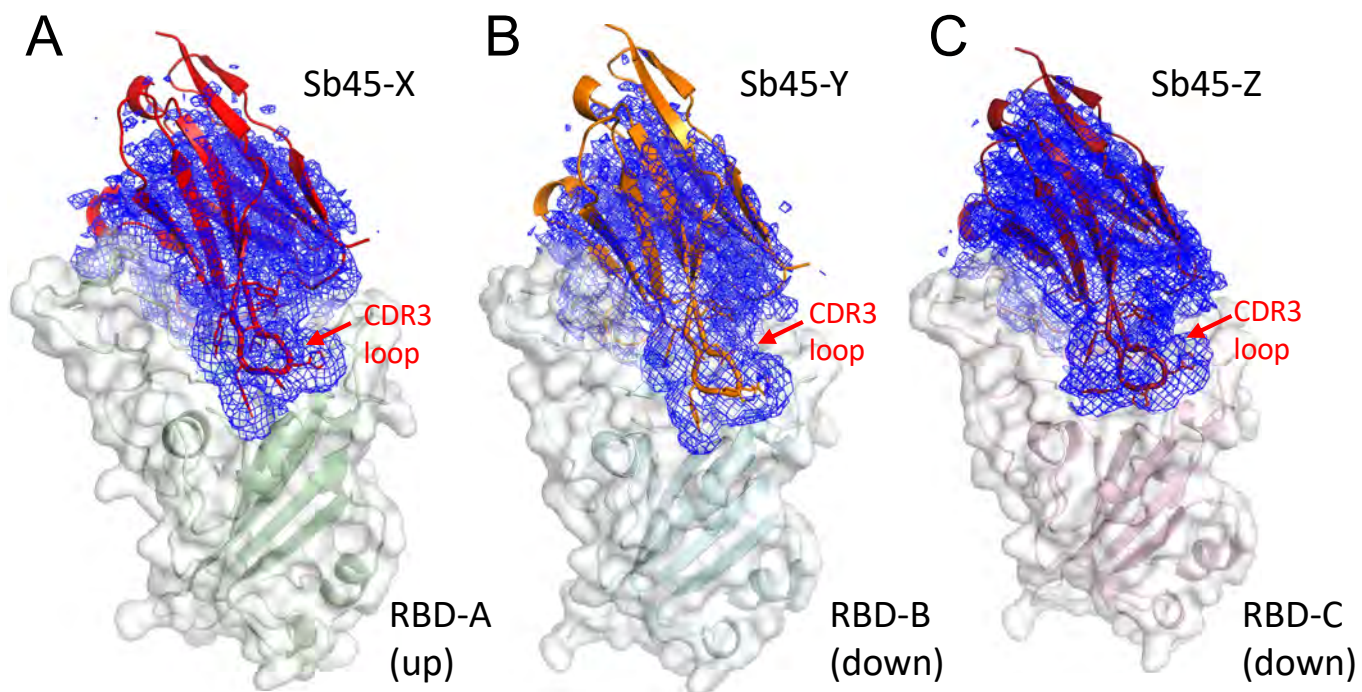

Sb45+S-6P (2-up, 1-down)

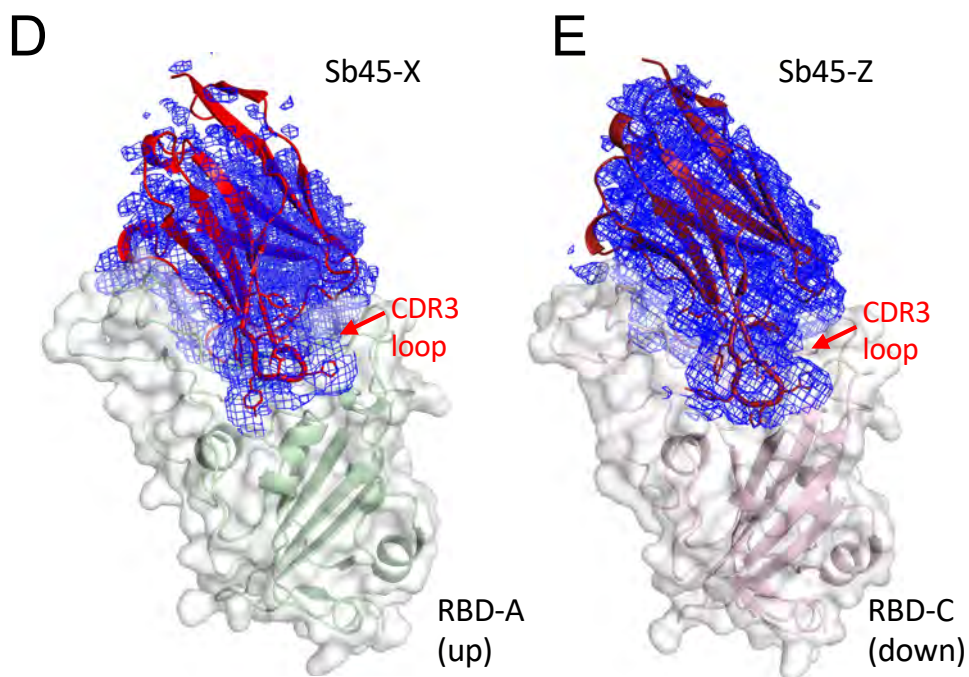

Figure S5.

**Figure S5. Cryo-EM electron density map of Sb45 on S-6P.** Extracted electron density of Sb45 on S-6P from cryo-EM map. *A*, Sb45-X on RBD-A (up) of S-6P (1-up, 2-down). *B*, Sb45-Y on RBD-B (down) of S-6P (1-up, 2-down). *C*, Sb45-Z on RBD-C (down) of S-6P (1-up, 2-down). *D*, Sb45-X on RBD-A (up) of S-6P (2-up, 1-down). *E*, Sb45-Z on RBD-C (down) of S-6P (1-up, 2-down). Electron densities (blue) are contoured at  $1.5 \sigma$ . Sb45-X, Sb45-Y and Sb45-Z are colored red, orange, and firebrick, respectively; RBD-A, RBD-B, and RBD-C are colored pale green, pale cyan, and light pink respectively. RBDs are shown in surface as gray. The local resolution for Sb45 is in a range of 4.5-7.0 Å and CC (Correlation Coefficient) is lower, the side chains of CDR3 loops are seen in good density, tightly binding to RBD.

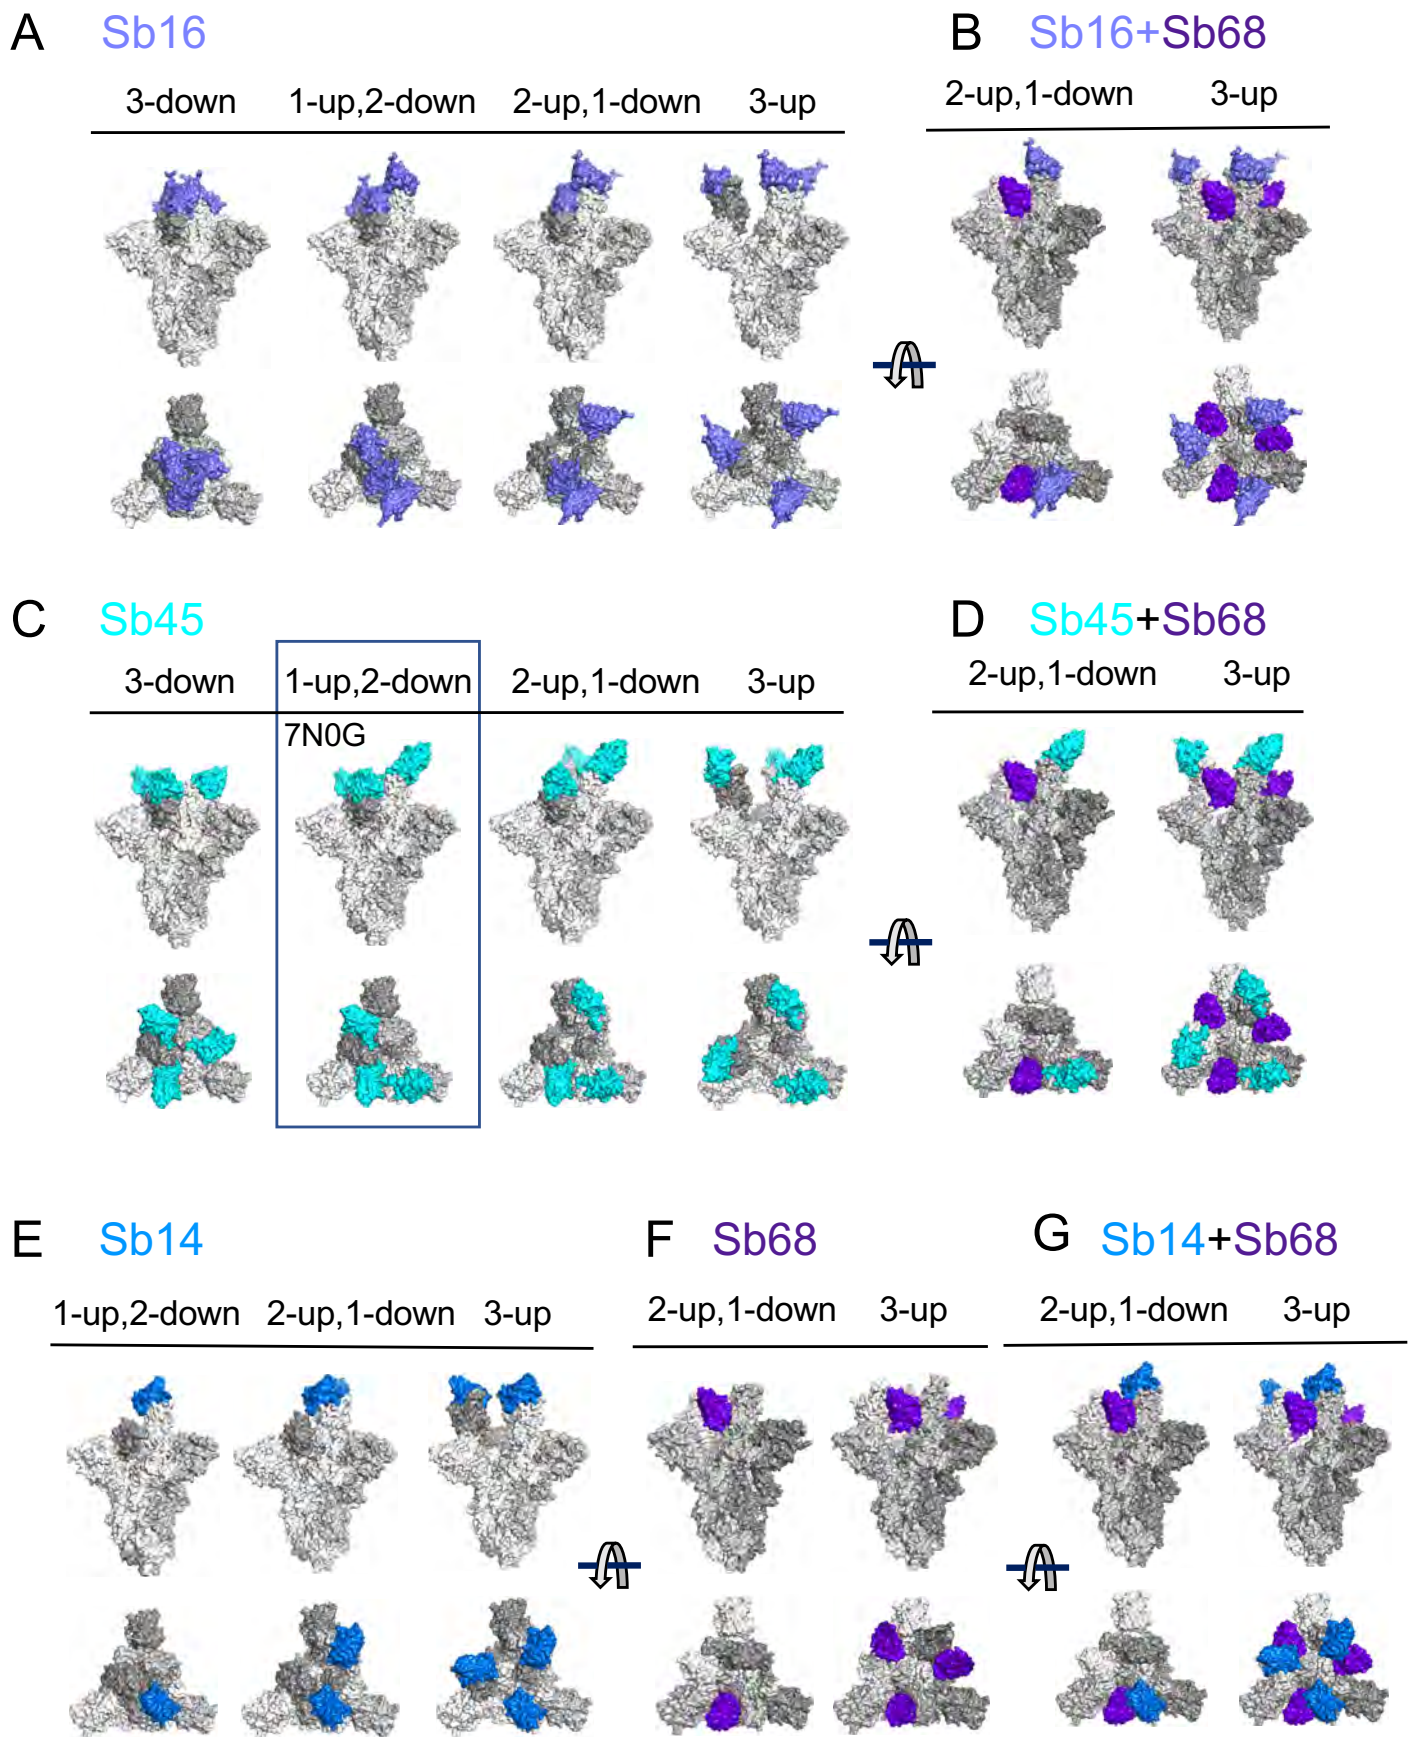

Figure S6.

**Figure S6. Superposition of X-ray models on spike maps.** All spike models are based on 7N0G/7N0H (Sb45+S-6P). *A*, Superposition of Sb16-RBD (7KGJ, slate) on the four forms of spike. *B*, Binding of both Sb16 and Sb68 on the 2-up and 3-up forms of spike. *C*, Superposition of Sb45-RBD (7KGK, cyan) on the four forms of spike. *D*, Binding of (Sb45 and Sb68)-RBD (7KLW) on 2-up and 3-up forms of spike. *E*, Sb14-RBD (7MFU, marine blue) can only access to the three “up” forms of spike. *F*, Sb68 (blue purple) can only access the 2-up and 3-up forms. *G*, Superposition of (Sb14 and Sb68)-RBD (7MFU) on 2-up and 3-up forms of spike. A-, B- and C-chains of spike are colored as white, grey-80%, and grey-60% respectively.

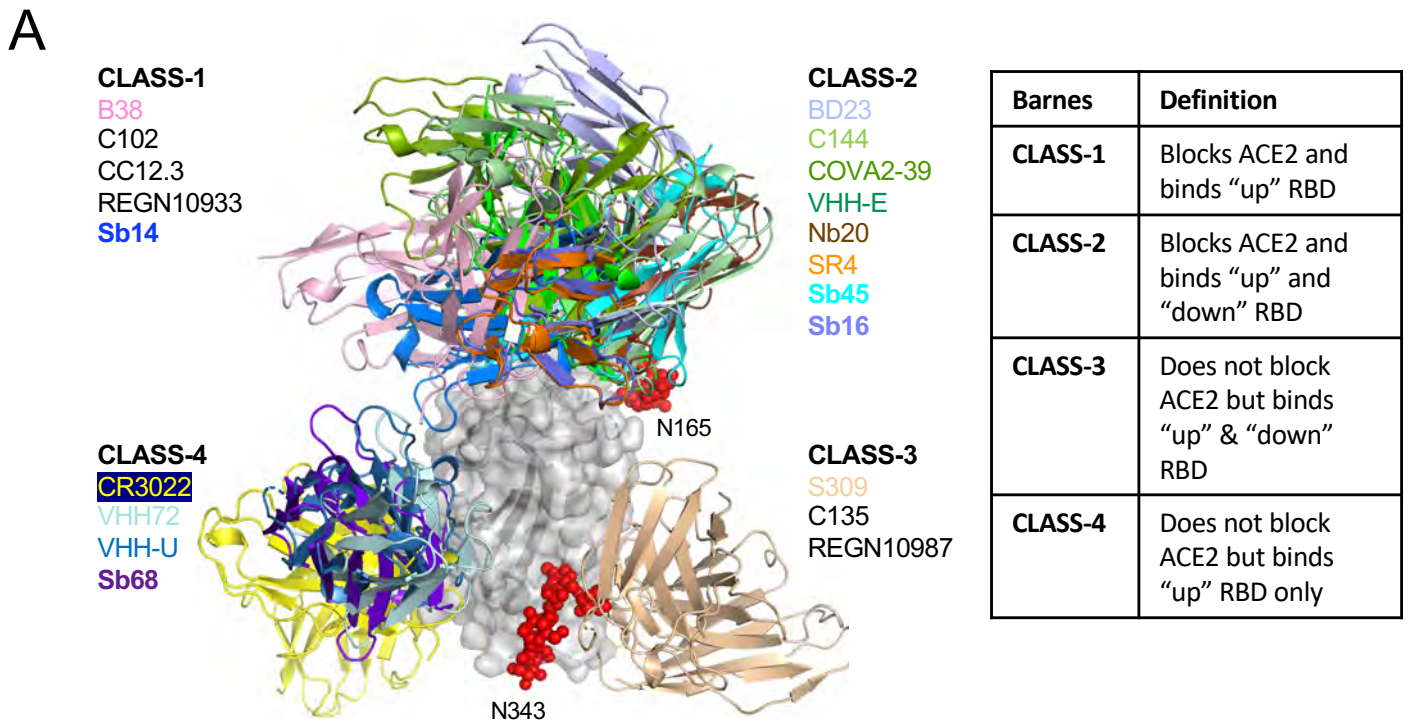

**B 7KLW and 7MFU vs 7KN5**

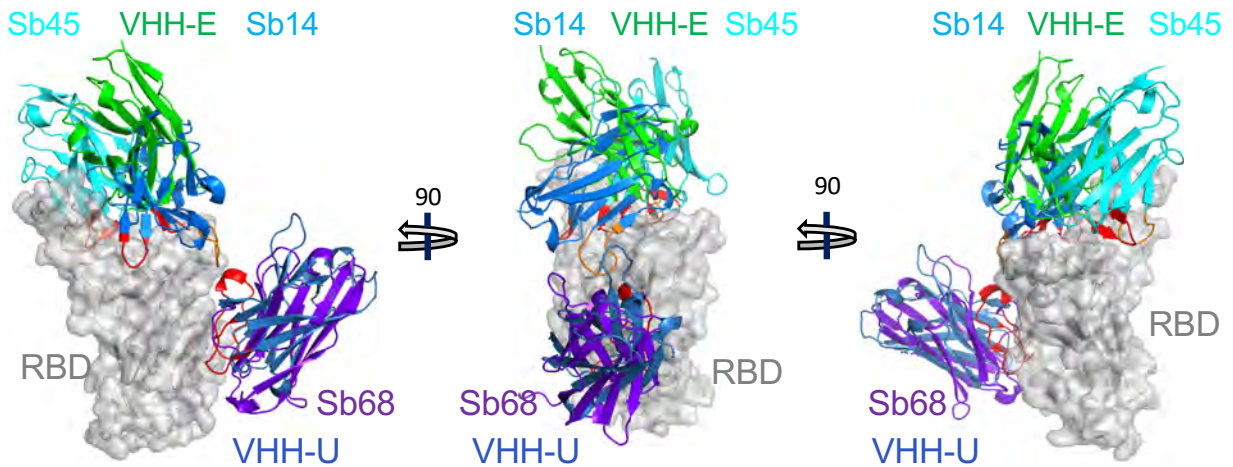

**C 7MLU**

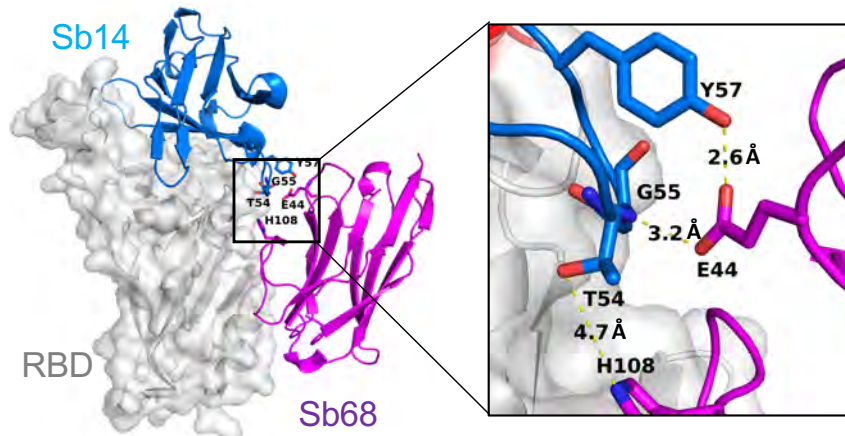

Figure S7.

**Figure S7. Antibody classifications based on site of RBD interaction.** *A*, Definition of Classes. Representative Fab (only showing the variable domains), nanobody, or sybody illustrated with different colors show the classifications. RBD is in gray and two N-glycans (N165 and N343 in red). Sb14 (marine blue) belongs to Class-1, Sb16 (slate blue), and Sb45 (cyan) belong to Class-2, and Sb68 (purple blue) falls in Class-4 overlapping with VHH72, VHH-E, and CR3022. *B*, Comparison of the ternary sybody structures (Sb45+RBD+Sb68, 7KLW) and (Sb14+RBD+Sb68, 7MLU) with the ternary nanobody structure (VHH-E+RBD+VHH-U, 7KN5). Sb45 in cyan, Sb68 in purple blue, RBD in gray, VHH-E in green, VHH-U in blue. CDR1, CDR2, and CDR3 of Sb45, CDR3 of Sb68 are highlighted in pink, orange, and red. Three views of 90 degrees of rotation. CDR3 and CDR2 loops of Sb45 interacts with both sides of the RBD, while VHH-E uses only the extended CDR3 loop on the side. Sb68 binds lower than VHH-U while VHH-E is closer to VHH-72. The total BSA ( $\text{\AA}^2$ ) for 7KLW, 7MFU and 7KN5 are 1,650, 1,663, and 1,446 respectively. *C*, The interactions between Sb14 and Sb68 in the ternary structure (Sb14+RBD+Sb68, 7MFU): Y57-E44, G55-E44, and T54-H108.

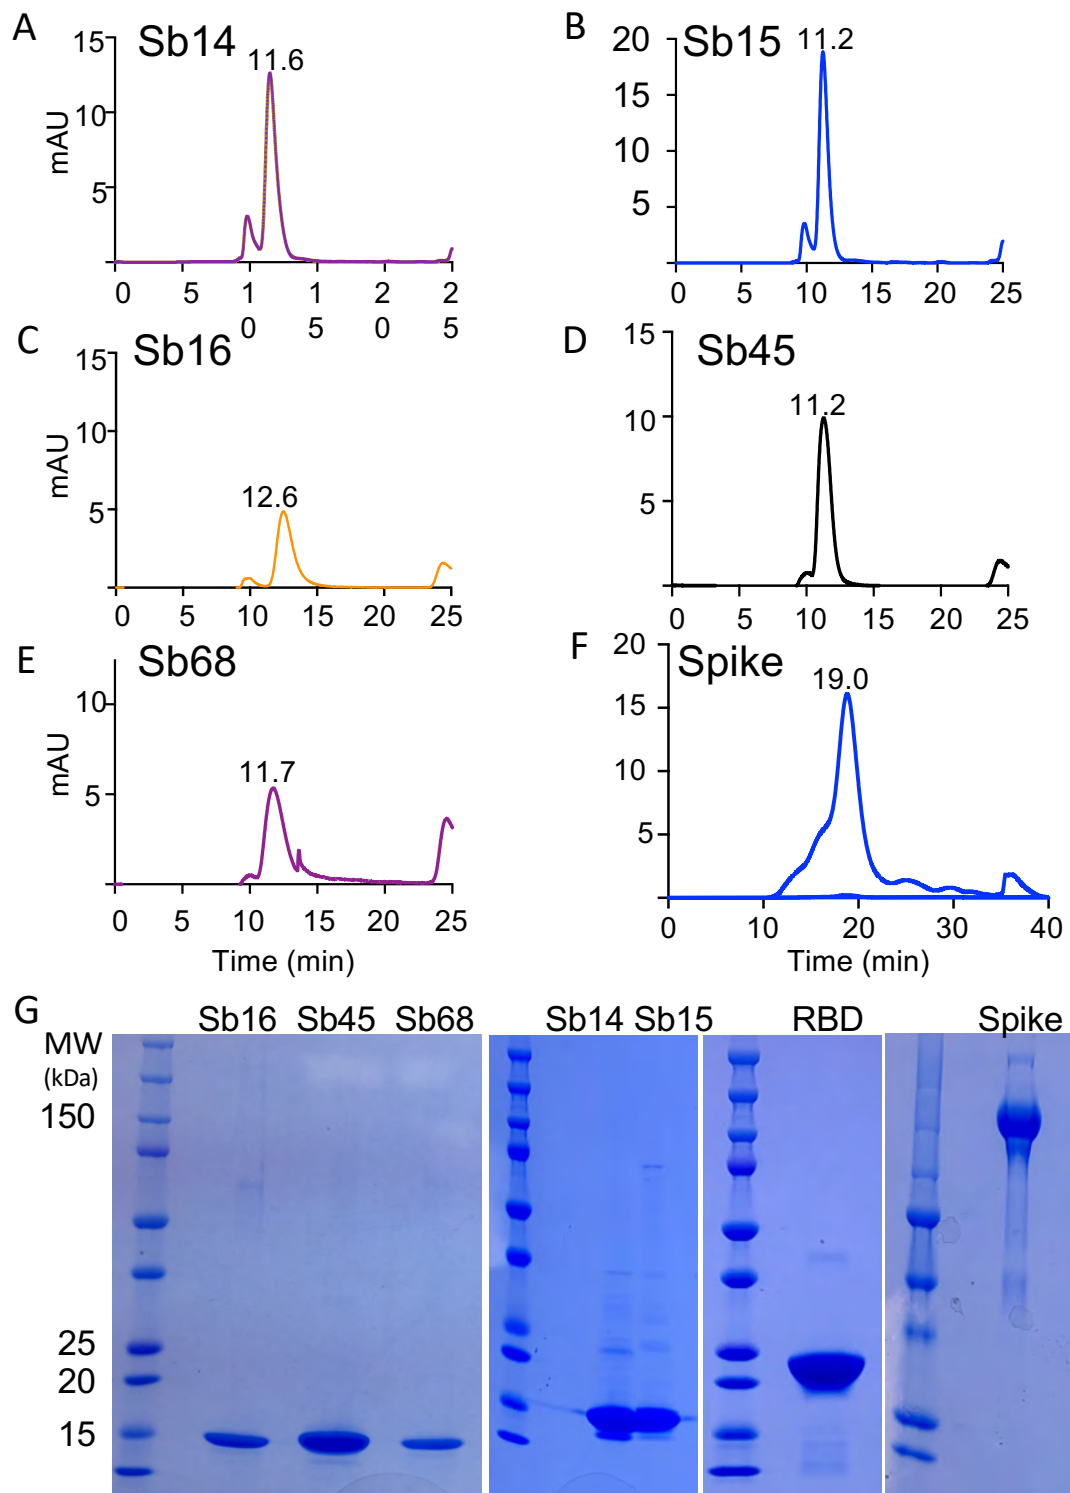

Figure S8.



**Figure S8. Purity of sybodies, RBD, and S.** *A, B, C, D, E*, Monomeric sybodies as indicated were purified on SRT-10C-SEC100 columns. Elution time of each sybody is indicated above each peak. The *y* axis represents  $A_{280}$  nm absorbance units (mAU). *F*, SEC profile of trimeric spike protein (Superose™ 6 10/300 GL). *G*, SDS-PAGE image of purified sybodies, RBD and S.

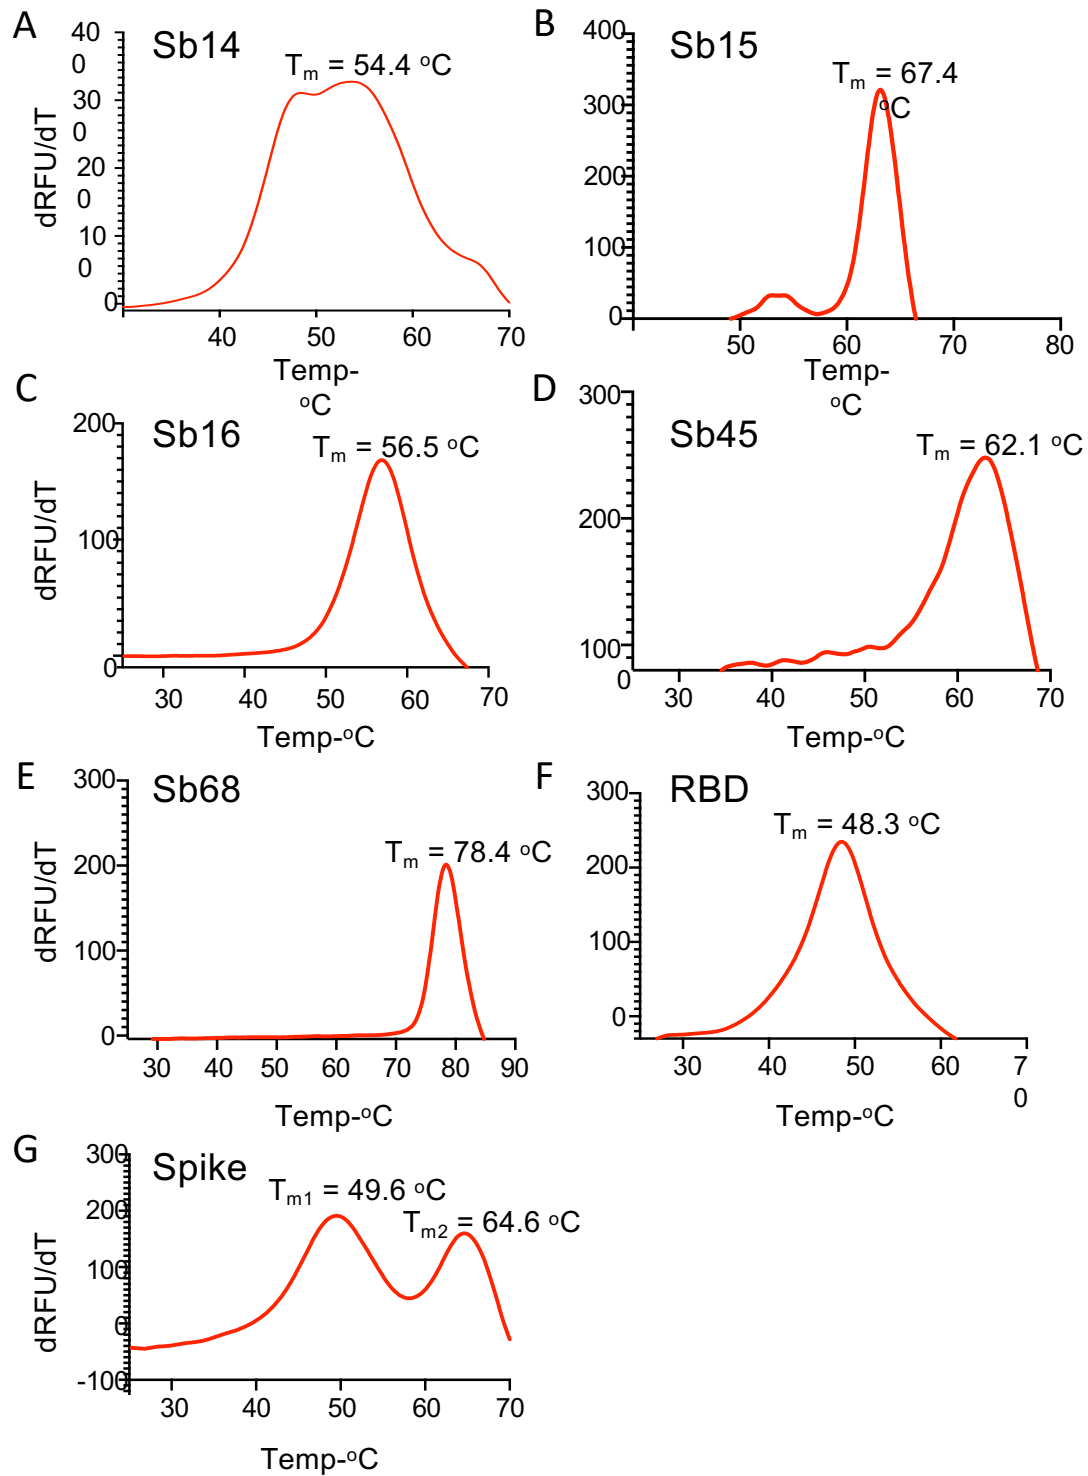

**Figure S9. Sybodies, RBD, and spike protein reveal unique thermal stability.**  $T_m$  of each of the indicated purified proteins was determined by thermal melt analysis as described in Experimental procedures. Note the biphasic behavior of the trimeric S protein.
